# Supplementary material for: Eu MOF-enhanced FeNCD nanozymes for fluorescence and highly sensitive colorimetric detection of tetracycline
Source: Royal Society of Chemistry journal article supplement (doi:10.1039/d3an02046k), 2023-12-12
Supplement: d3an02046k1.pdf [file d3an02046k1.pdf]

## Supporting Information

### **Eu MOF-Enhanced FeNCDs Nanozymes for Fluorescence and Highly Sensitive Colorimetric Detection of Tetracycline**

*Cheng Chen <sup>a</sup>, Jing Li <sup>a</sup>, Fang Luo <sup>a</sup>, Zhenyu Lin <sup>a</sup>, Jian Wang <sup>a</sup>, Tao Zhang <sup>c\*</sup>, Aiwen Huang<sup>\*b</sup>, Bin Qiu <sup>a\*</sup>*

*<sup>a</sup> Ministry of Education Key Laboratory for Analytical Science of Food Safety and Biology, Fujian Provincial Key Laboratory of Analysis and Detection for Food Safety, Eel farming and processing, Fuzhou University, Fuzhou, Fujian, 350108, P. R. China.*

*<sup>b</sup> Clinical pharmacy department, 900TH Hospital of Joint Logistics Support Force, Fuzhou, Fujian, 350001, P. R. China.*

*<sup>c</sup> Department of Orthopedics, Fuzhou Second Hospital Affiliated to Xiamen University, Fuzhou 350007 (P. R. China).*

**\* Corresponding author**

*E-mail: summer328cn@163.com (Bin Qiu)*

*743865543@qq.com (Aiwen Huang)*

*james155@foxmail.com (Tao Zhang)*

**Reagents and Instruments.** The reagents used in this experiment were all purchased and have not been further purified. Neomycin sulfate,  $\text{FeCl}_2 \cdot 4\text{H}_2\text{O}$ , anhydrous sodium acetate, 1,3,5-benzenetricarboxylic acid ( $\text{H}_3\text{BTC}$ ), TC, glutathione, KCl, NaF were purchased from Shanghai Aladdin Biochemical Technology Co, Ltd. TMB,  $\text{Eu}(\text{NO}_3)_3 \cdot 6\text{H}_2\text{O}$ ,  $\text{H}_2\text{O}_2$ , histidine, tyrosine,  $\text{CuSO}_4$ ,  $\text{MgSO}_4$  were purchased from Shanghai McLean Biochemical Co, Ltd.. Citric acid (CA), ethylenediamine (EDA), anhydrous ethanol (EtOH),  $\text{Na}_3\text{PO}_4$ ,  $\text{Na}_2\text{C}_2\text{O}_4$  were purchased from Sinopharm Chemical Reagent Co, Ltd. Phenylalanine was purchased from Beijing Bailingwei Technology Co, Ltd. Glucose purchased from Shanghai Shenggong Biological Engineering Co, Ltd.

The absorption spectrum of tetracycline was detected by Multiskan GO full-wavelength microplate reader purchased from Thermo Fisher Scientific. The fluorescence spectrum of tetracycline was detected by F-4600 FLSPECTOROP0HOTOMRT purchased from Hitachi High-tech Corporation. All solutions use deionized water prepared from DirectQ3 UV system (conductivity 18.2  $\text{M}\Omega/\text{cm}$ , equipment purchased from Merkmillibour, Germany).

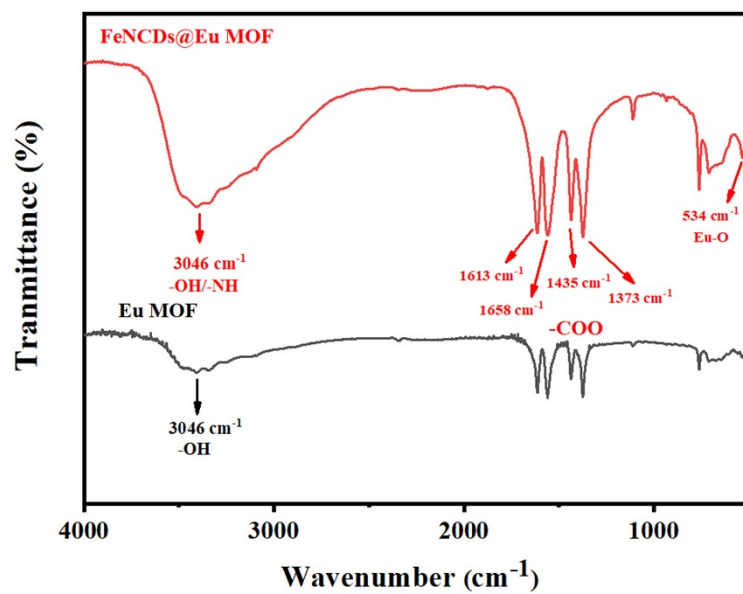

Figure S1. FTIR of Eu MOF and FeNCDS@Eu MOF.

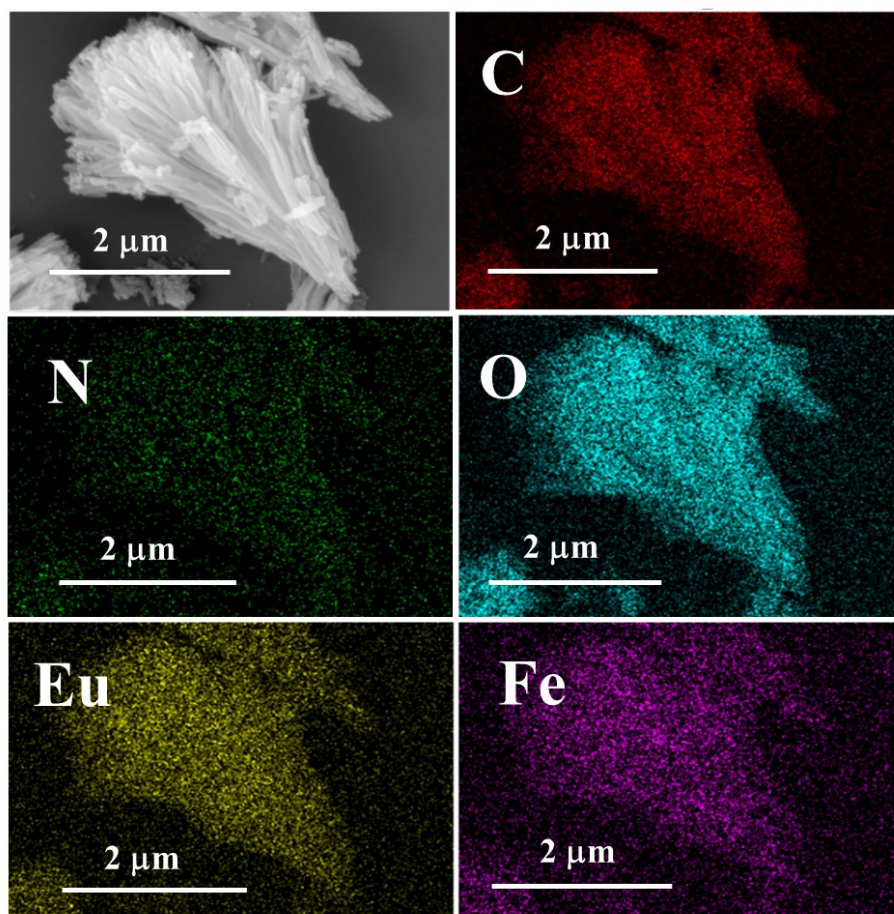

Figure S2. SEM image and corresponding EDS mapping images of C, N, O, Eu and Fe of FeNCDS@Eu MOF.

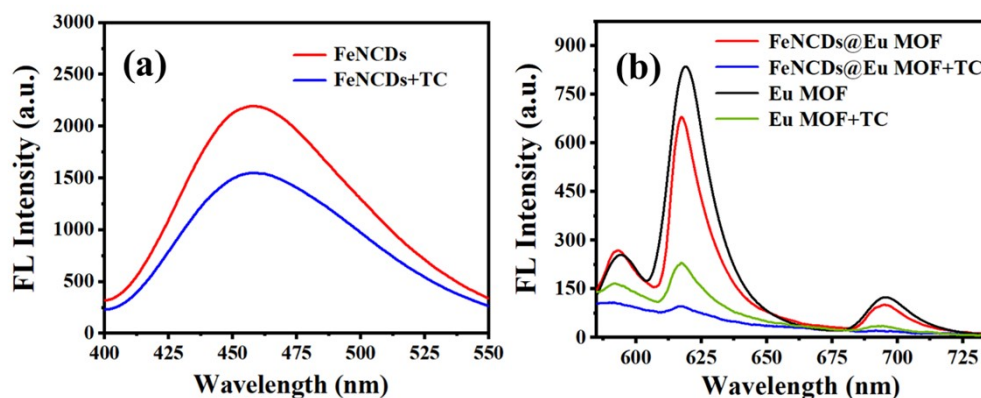

Figure S3. Fluorescence emission spectrum of (a) FeNCDs and FeNCDs+TC ( $\lambda_{\text{ex}} = 365$  nm), (b) FeNCDs@Eu MOF, FeNCDs@Eu MOF+TC, Eu MOF and Eu MOF+TC ( $\lambda_{\text{ex}} = 280$  nm). The concentration of TC is  $250 \mu\text{M}$ .

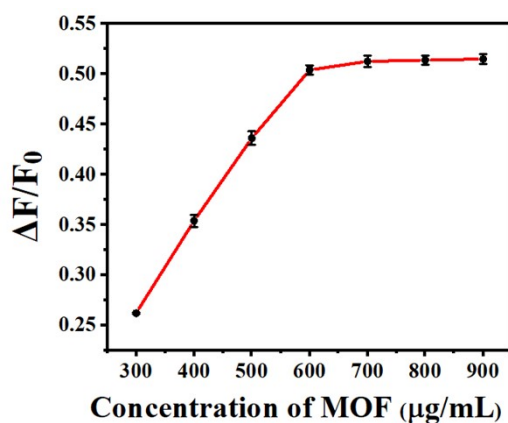

Figure S4. Optimize the concentration of FeNCDs@Eu MOF. The TC concentration is  $50 \mu\text{M}$ ,  $\Delta F/F_0 = (F_{\text{H}_2\text{O}} - F_{\text{TC}})/F_{\text{H}_2\text{O}}$ .

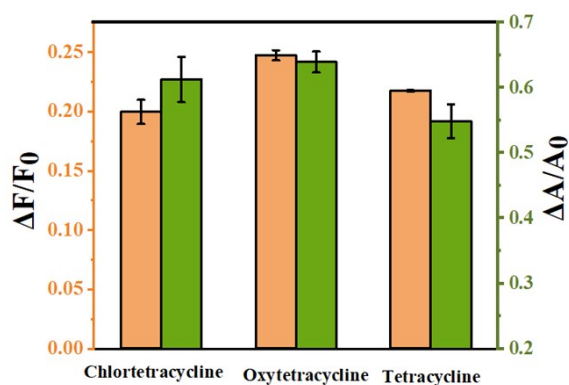

Figure S5. Sensor responses to chlortetracycline, oxytetracycline and TC. Their concentrations are  $500 \text{ nM}$ .
